# Supplementary material
Source: publisher figshare collection journal article supplement (https://acs.figshare.com/ndownloader/files/4066180)
Supplement: Supplementary file 1 [file 4066180]

## Supporting information

### Detection of drug bioactivation *in vivo*: Mechanism of nevirapine-albumin conjugate formation in patients

Xiaoli Meng, Alice Howarth, Caroline J Earnshaw, Rosalind E Jenkins, Neil S French, David J Back, Dean J Naisbitt, B Kevin Park\*

MRC Centre for Drug Safety Science, Department of Molecular and Clinical Pharmacology, University of Liverpool, UK;

### CONTENTS

**Figure S1.** Quantitative analysis of NVP and 12-OH-NVP metabolite in plasma from HIV patients receiving NVP. 12-OH-NVP standard (a), 12-OH-NVP (b) and NVP (c) detected in patient plasma, standard curve was constructed with synthetic 12-OH-NVP ranging from 1 nM to 1  $\mu$ M (in 50% methanol/0.1% TFA) (d).

**Figure S2.** Characterisation of human GSTP expressed in *E.coli*. Amino acid sequence of human GSTP is listed (a); Crude GSTP was resolved by SDS-PAGE using 10% gel (b); peptide mass fingerprinting by MALDI-MS to characterize GSTP (c).

**Figure S3.** MS/MS analysis of NVP-modified HSA peptides identified *in vitro*. MS/MS spectra of tryptic peptide <sup>241</sup>VHTECCHGDLLECADDR<sup>257</sup> modified by NVP at either His242 or His247. Characteristic fragment ions from NVP group are circled (a); MS/MS spectra of tryptic peptide <sup>337</sup>RH\*PDYSVLLLR<sup>348</sup> modified by NVP at His338 marked with an \* (b);

**Figure S1**

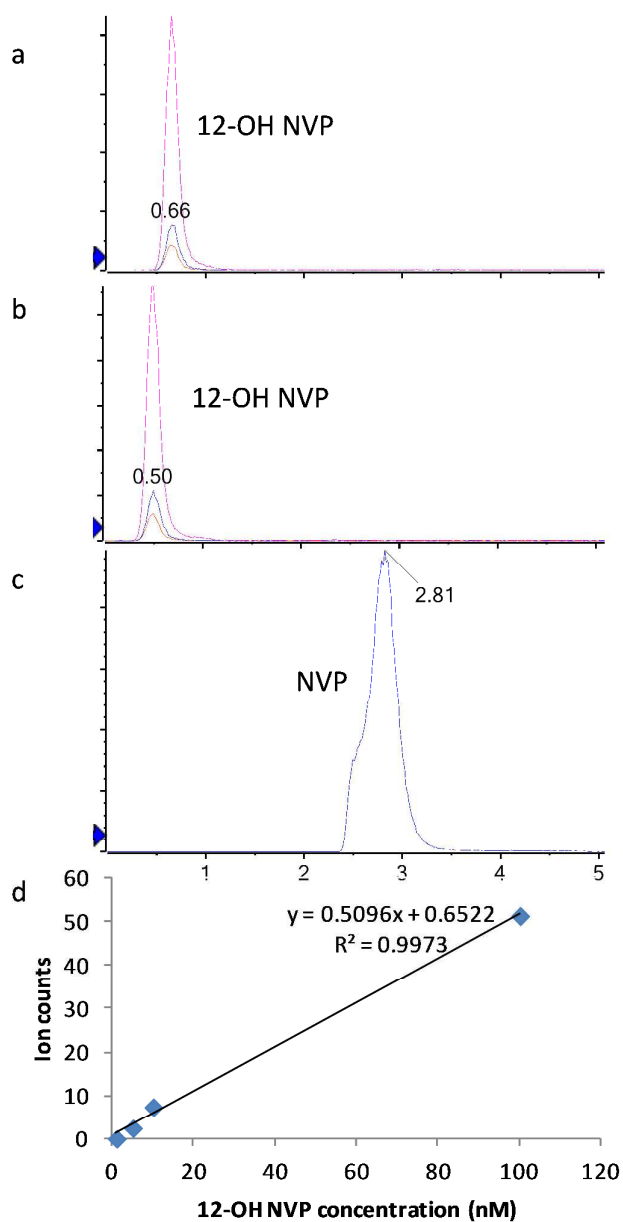

**Figure S1.** Quantitative analysis of NVP and 12-OH-NVP metabolite in plasma from HIV patients receiving NVP. 12-OH-NVP standard (a), 12-OH-NVP (b) and NVP (c) detected in patient plasma, standard curve was constructed with synthetic 12-OH-NVP ranging from 1 nM to 1  $\mu$ M (in 50% methanol/0.1% TFA) (d).

Figure S2

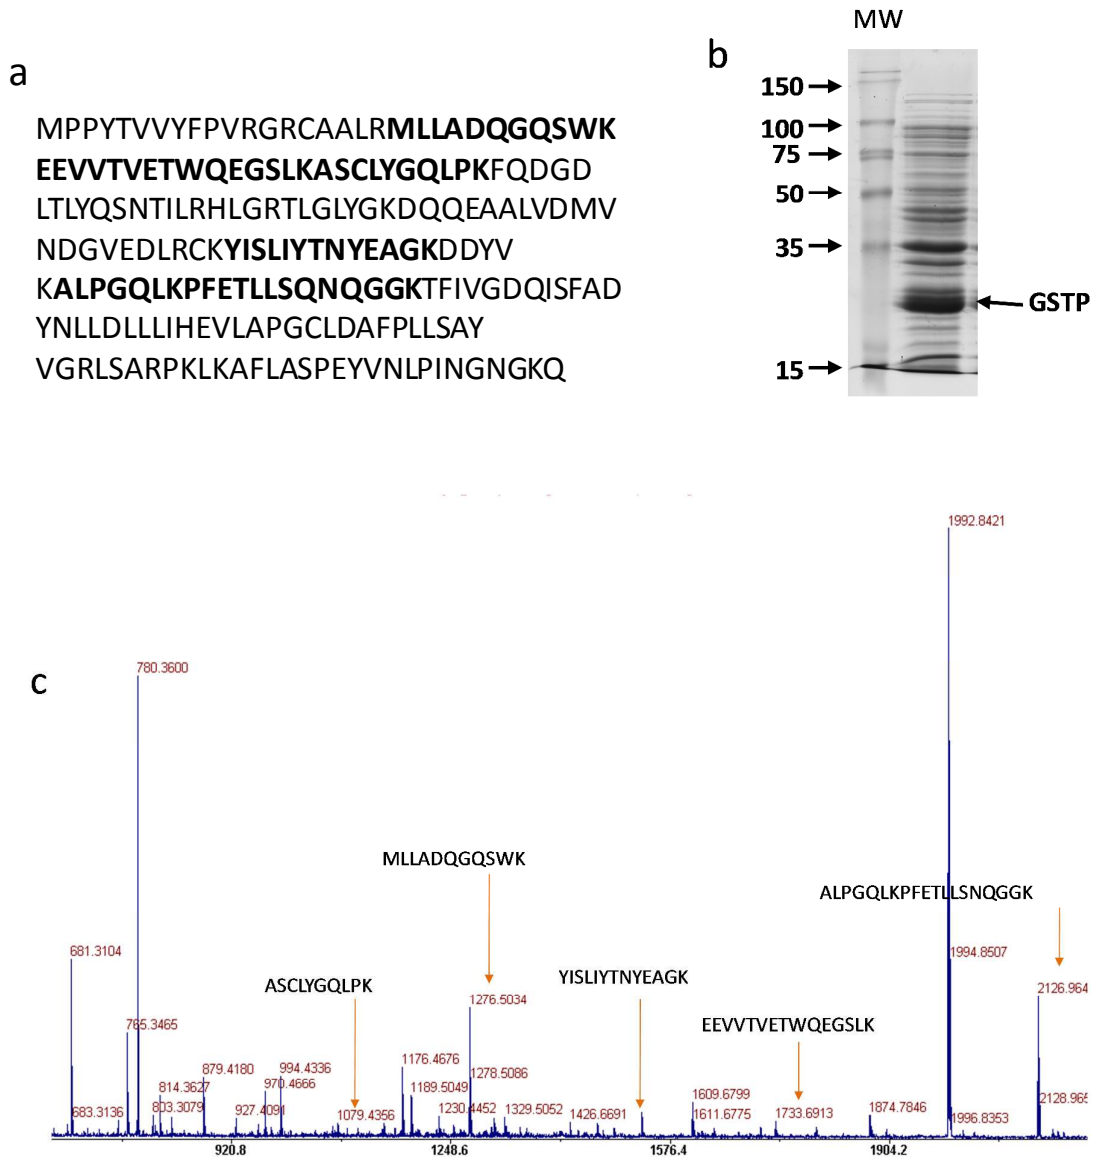

**Figure S2. Characterization of human GSTP expressed in *E.coli*.** Amino acid sequence of human GSTP is listed (a); Crude GSTP was resolved by SDS-PAGE using 10% gel (b); peptide mass fingerprinting by MALDI-MS to characterize GSTP (c).

Figure S3

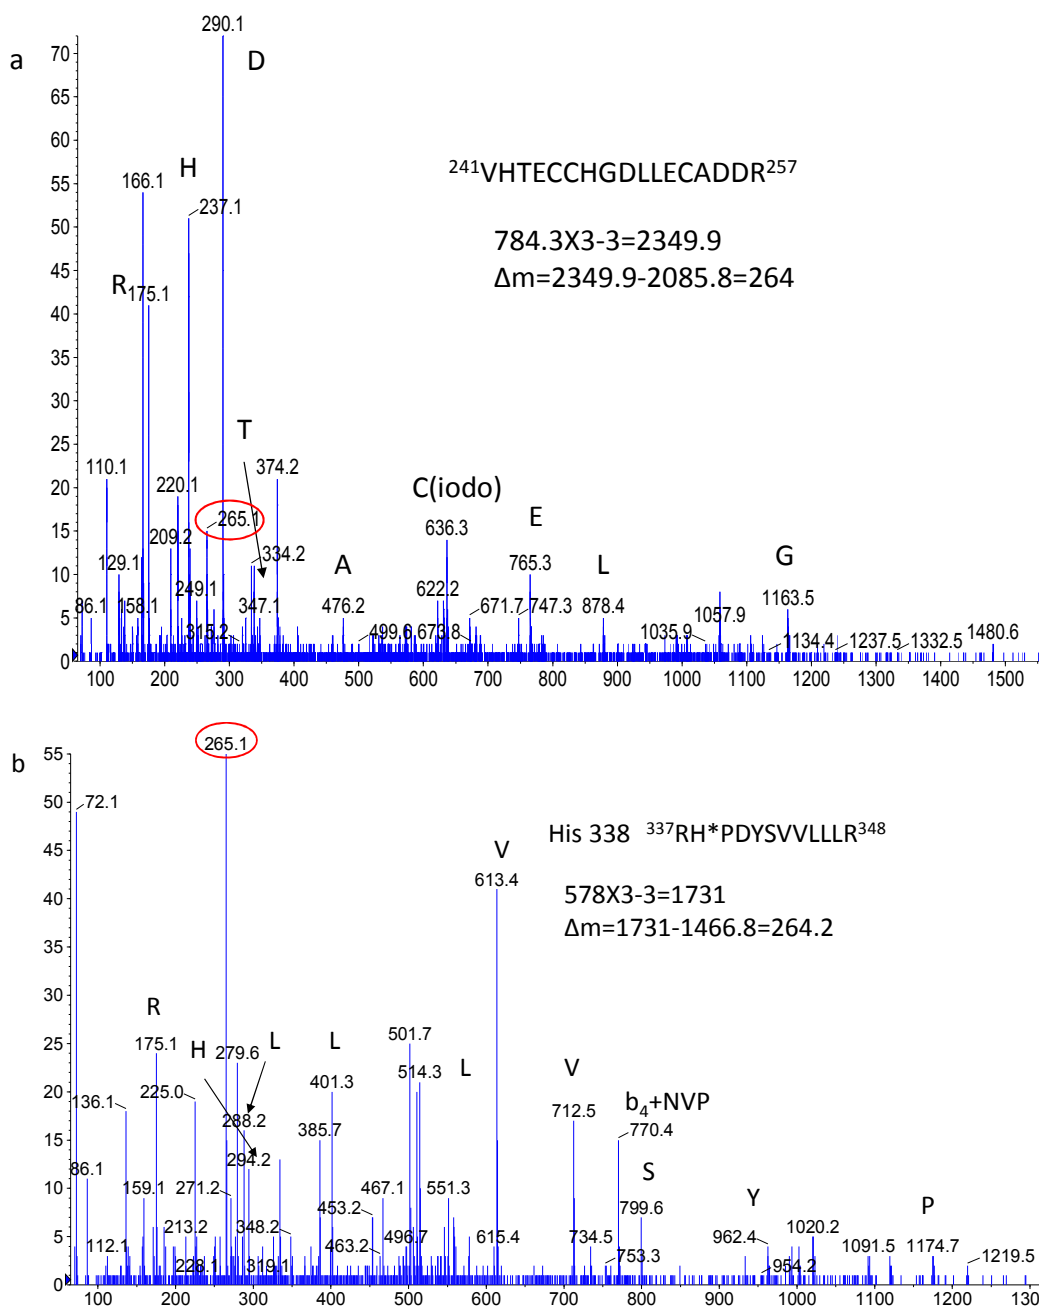

**Figure S3.** MS/MS analysis of NVP-modified HSA peptides identified *in vitro*. MS/MS spectra of tryptic peptide  $^{241}\text{VHTECCHGDLLECADDR}^{257}$  modified by NVP at either His242 or His247. Characteristic fragment ions from NVP group are circled (a); MS/MS spectra of tryptic peptide  $^{337}\text{RH}^*\text{PDYSVLLLLR}^{348}$  modified by NVP at His338 marked with an \* (b);
